# Supplementary material for: Prodrug nanotherapy demonstrates in vivo anticryptosporidial efficacy in a mouse model of chronic Cryptosporidium infection
Source: PubMed Central journal article supplement — RSC Pharm. 2024 Sep 19;1(5):963–75. doi: 10.1039/d4pm00093e (PMC11447440; doi:10.1039/d4pm00093e), 2024-09-19
Supplement: PM-001-D4PM00093E-s001.pdf [file PM-001-D4PM00093E-s001.pdf]

**Title:** Prodrug Nanotherapy Demonstrate In Vivo Anticryptosporidial Efficacy in a Mouse Model of Chronic Cryptosporidium Infection

Amalendu P. Ranjan<sup>1,†</sup>, Daniel J. Czyzyk<sup>2,†</sup>, Griselle Martinez-Traverso<sup>3</sup>, Aygul Sadiqova<sup>3</sup>, Margarita Valhondo<sup>4</sup>, Deborah A. Schaefer<sup>6</sup>, Krasimir A. Spasov<sup>2</sup>, William L. Jorgensen<sup>4</sup>, Jamboor K. Vishwanatha<sup>1</sup>, Michael W. Riggs<sup>6</sup>, Alejandro Castellanos-Gonzalez<sup>3\*</sup>, and Karen S. Anderson<sup>2,5\*</sup>

<sup>1</sup>Department of Microbiology, Immunology and Genetics, College of Biomedical and Translational Sciences, University of North Texas Health Science Center, Fort Worth, TX 76107, USA

<sup>2</sup>Department of Pharmacology, Yale University School of Medicine, 333 Cedar Street, New Haven, CT 06520, USA

<sup>3</sup>Infectious Disease Division, Department of Internal Medicine, University of Texas Medical Branch, Galveston, TX 77555, USA

<sup>4</sup>Department of Chemistry, Yale University, 225 Prospect Street, PO Box 208107, New Haven, CT 06520, USA

<sup>5</sup>Department of Molecular Biophysics and Biochemistry, Yale University School of Medicine, 333 Cedar Street, New Haven, CT 06520, USA

<sup>6</sup>School of Animal and Comparative Biomedical Sciences, College of Agriculture and Life Sciences, University of Arizona, Tucson, AZ 85721, USA

\*Address correspondence to Amalendu P. Ranjan, Department of Microbiology, Immunology and Genetics, College of Biomedical and Translational Sciences, University of North Texas Health Science Center, Fort Worth, TX 76107, USA, [Amalendu.ranjan@unthsc.edu](mailto:Amalendu.ranjan@unthsc.edu), (817) 735 2138, Alejandro Castellanos-Gonzalez, Infectious Disease Division, Department of Internal Medicine, University of Texas Medical Branch, Galveston, TX 77555, USA, [alcastel@UTMB.edu](mailto:alcastel@UTMB.edu), (409) 772-3729), Karen S. Anderson, Department of Pharmacology, Yale University School of Medicine, 333 Cedar Street, New Haven, CT 06520, USA, [karen.anderson@yale.edu](mailto:karen.anderson@yale.edu), (203) 785-4526

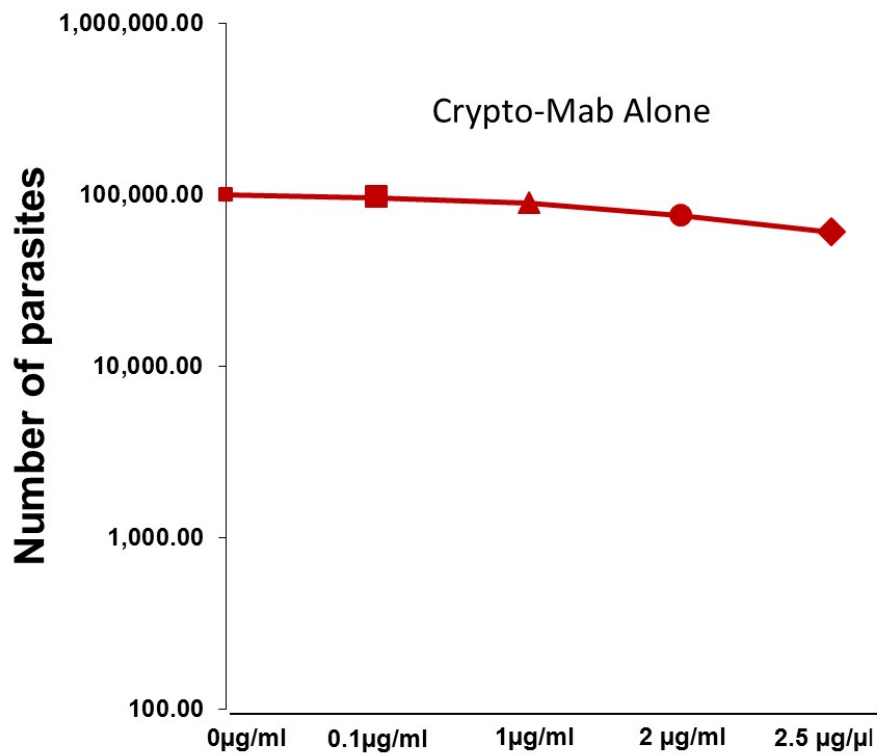

**Fig S1. Effect of Mab on *C. parvum* growth.**  $5 \times 10^5$  parasites were used to infect HCT-8 cells and treated with MAb-GP25-200. After 24 hrs of infection number of parasites were determined by RT-PCR.

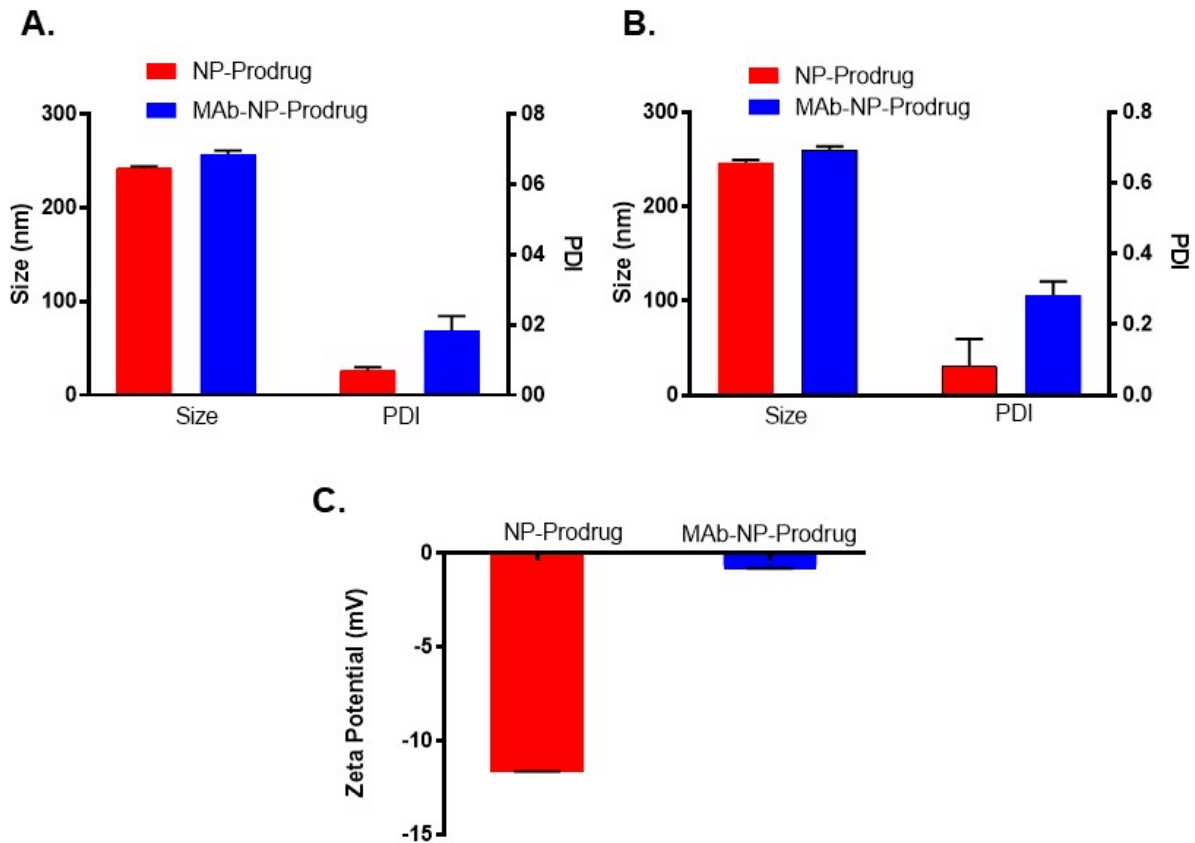

**Fig S2:** Physicochemical characterization **MAb** conjugated, **Prodrug** loaded PLGA nanoparticles **NPs** A) Particle size and PDI of NP-Prodrug and **MAb-NP-Prodrug** conjugated prodrug loaded PLGA NPs for cell culture study, B) Particle size and PDI of prodrug loaded PLGA **NPs** and **MAb-NP-Prodrug** for animal studies, C) Zeta potential of **NP-Prodrug** and **MAb-NP-Prodrug** measured by dynamic light scattering.

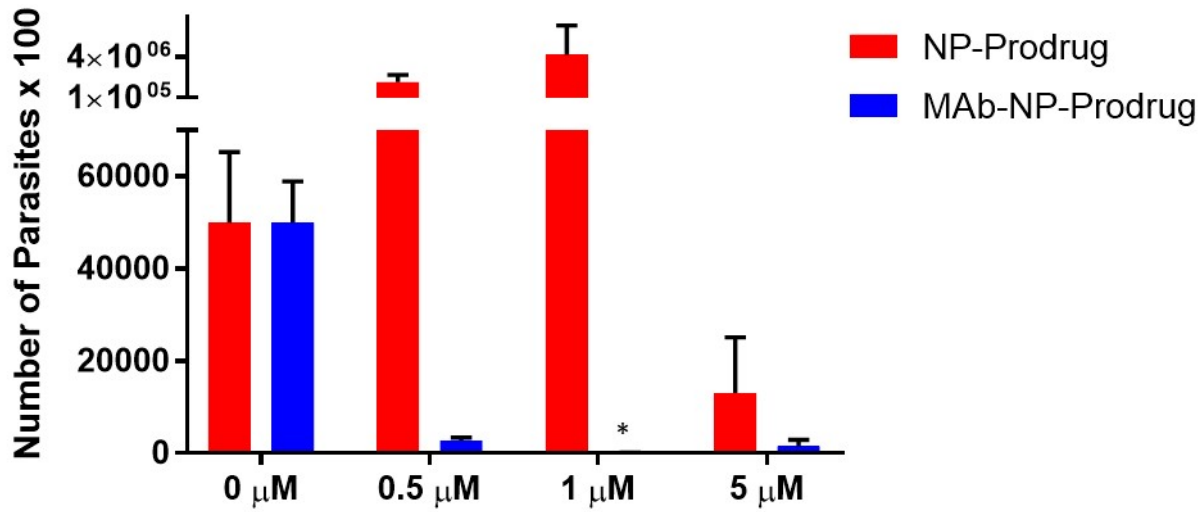

**Fig S3: Anti-*Cryptosporidium* activity in cell culture for the MAb-NP-Prodrug and NP-Prodrug.** Anticryptosporidial activity of **NP-Prodrug** (red) and **MAb-NP-Prodrug** (blue) was evaluated on RNA extracted from HCT-8 cells by RT-PCR. (\*), below detection limit of experiment. A range of concentrations (0-5 μM) was used to evaluate the effect of drug on infected cells. The results are shown as the average of 3 independent experiments (bars), ± STD of the means are indicated with vertical bars.

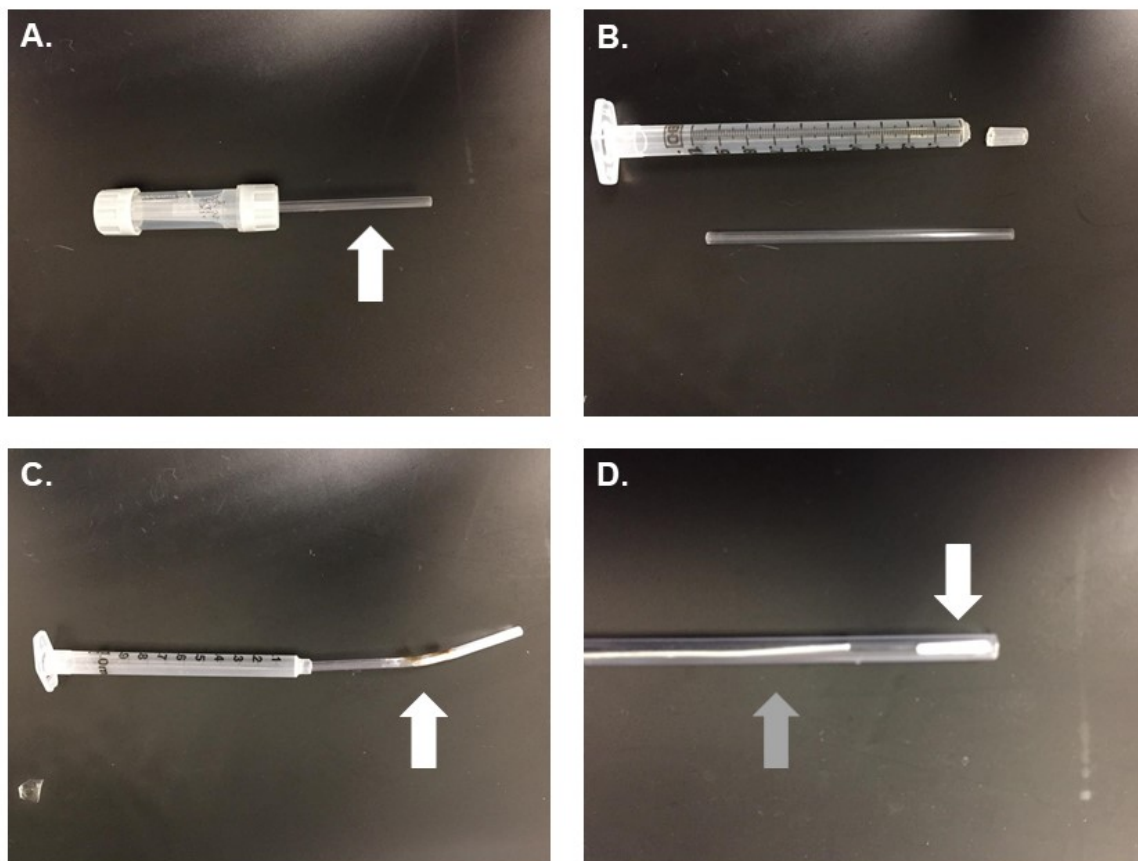

**Fig S4.** Construction of device used to deliver enteric coated capsules containing either **MAb-NP-Prodrug** or **NP** into SCID/Beige mouse stomach. A) Acrylic capillary (white arrow) is removed from a Microvette 200 Capillary Blood Collection Tube (Fisher Scientific) (Length including cap: 47.6 mm). B) The tip of a 1cc syringe is removed and the acrylic capillary is inserted into the syringe. C) The acrylic capillary is slightly bent (white arrow) by heating in boiling water for a few seconds. D) The enteric coated capsule containing either **MAb-NP-Prodrug** or **NP** is inserted into end of capillary (white arrow). Wire is inserted through syringe (gray arrow) to push capsule out of capillary once device enters the mouse stomach.

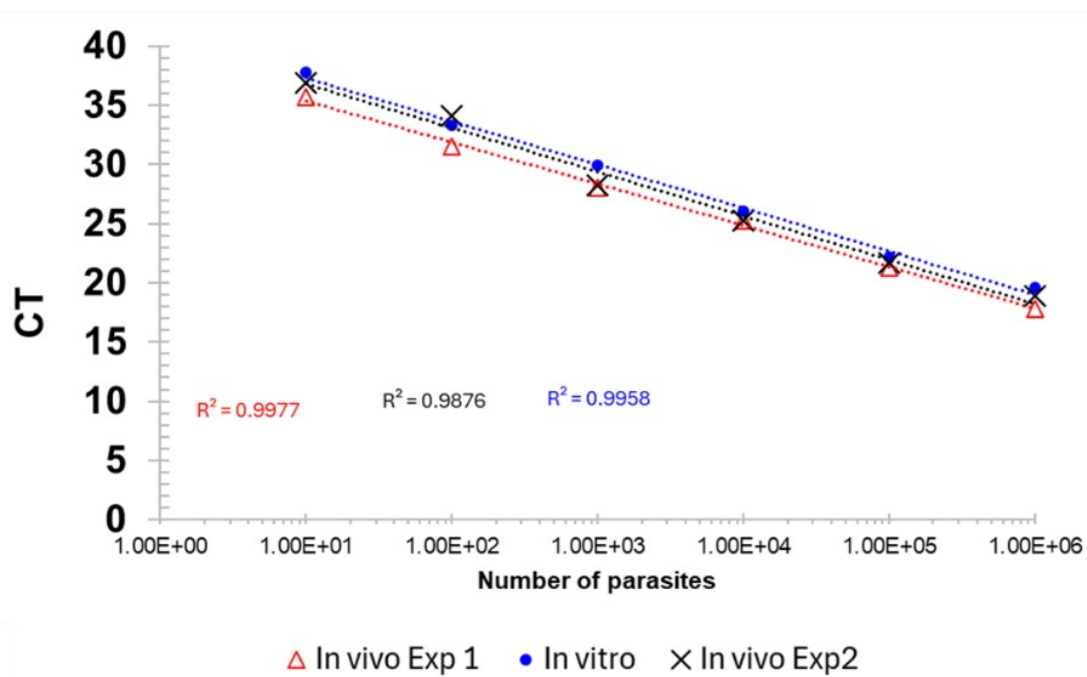

**Fig S5.** Standard curve for quantification of *Cryptosporidium* parasites by real-time PCR. The standard curve was obtained by amplification of *Cryptosporidium* DNA from  $1 \times 10^6$  to  $1 \times 10^0$ . Standard curve (Sc) of mice experiment shown in figure 3 (red), Sc of In vitro experiment shown in figure 5 (blue), Sc of mice experiment shown in Figure 6 (black).

**Table S1.** Characterization drug loading for *Cryptosporidium*-MAb-PLGA-Prodrug (**MAb-NP-Prodrug**)

| NPs     | EE %       | DL %       |
|---------|------------|------------|
| Batch 1 | 52.4 ± 5.0 | 7.1 ± 0.8  |
| Batch 2 | 54.7 ± 5.9 | 12.2 ± 1.3 |
| Batch 3 | 59.7 ± 6.7 | 10.8 ± 1.3 |

**Table S2** IC<sub>50</sub> (μM) for *Ch*TS-DHFR<sup>a</sup>

| Compound               | <i>Ch</i> TS IC <sub>50</sub> | <i>Ch</i> DHFR IC <sub>50</sub> |
|------------------------|-------------------------------|---------------------------------|
| <b>906<sup>b</sup></b> | 0.38 ± 0.04                   | 0.049 ± 0.005                   |
| <b>906-ester</b>       | > 100                         | 30.0 ± 2.5                      |

<sup>a</sup> SD from triplicate measurement. <sup>b</sup> Results from reference <sup>1, 2</sup>

**Table S3** Parasite Number Reduction with Duodenal Catheter Dosing of Drug (per 25 mg stool)

|                                          | Day 0 | Day 8 | Day 15 |
|------------------------------------------|-------|-------|--------|
| <b>Mouse Treated with PBS</b>            |       |       |        |
| 1                                        | 3900  | 7207  | 3008   |
| 2                                        | 1078  | 5623  | 4190   |
| 3                                        | 16590 | 433   | 21900  |
| 4                                        | 25700 | 50    | 17899  |
| <b>Mouse Treated with MAb-NP-Prodrug</b> |       |       |        |
| 1                                        | 1908  | 1     | 1      |
| 2                                        | 6409  | 1     | 3656   |
| 3                                        | 21090 | 7     | 1008   |
| 4                                        | 14007 | 1     | 13222  |
| 5                                        | 4290  | 909   | 1      |



**Table S4** Parasite Number Reduction Oral Dosing of Drug (per 25 mg stool)

|                                                                       | Day 1    | Day 2    | Day 3    | Day 4    | Day 5    | Day 6    | Day 8    | Day 10   | Day 12   | Day 15   | Day 16   |
|-----------------------------------------------------------------------|----------|----------|----------|----------|----------|----------|----------|----------|----------|----------|----------|
| <b>Mouse Treated with Enteric Coated Capsules with NP</b>             |          |          |          |          |          |          |          |          |          |          |          |
| 1                                                                     | 85151    | 64275    | 10844.05 | 20665.02 | 317149.8 | 86703.64 | 11255.58 | 40104.3  | 0.9      | 30794.31 | 33566.06 |
| 2                                                                     | 97661.1  | 57598.8  | 74151    | 70621.48 | 24382.05 | 0.9      | 6165.06  | 99146.09 | 73530.69 | 36626.27 | 0.9      |
| 3                                                                     | 8208.103 | 78151    | 0.9      | 0.9      | 54583.43 | 0.9      | 6255.73  | 6842.40  | 0.9      | 2671.243 | 278915.1 |
| 4                                                                     | 71151    | 0.9      | 62522.59 | 35879.25 | 65490.18 | 28727.83 | 7612.02  | 0.9      | 54517.2  | 0.9      | 14806.09 |
| 5                                                                     | 58344    | 5699.7   | 79151    | 209101.4 | 76062.14 | 9537.71  | 0.9      | 58225.54 | 3870.68  | 0.9      | 19288.59 |
| 6                                                                     | 84443.23 | 75151    | 0.9      | 46318.65 | 48166.86 | 28028.37 | 46318.65 | 18683.79 | 4327.33  | 11394.34 | 25280.31 |
| 7                                                                     | 65151    | 84542.2  | 0.9      | 115763.2 | 41261.48 | 0.9      | 29870.14 | 14667.31 | 26301.09 | 17795.85 | 39071.04 |
| <b>Mouse Treated with Enteric Coated Capsules with MAb-NP-Prodrug</b> |          |          |          |          |          |          |          |          |          |          |          |
| 1                                                                     | 75151    | 124591.1 | 0.9      | 0.9      | 148916.6 | 0.9      | 4460.088 | 67912.03 | 0.9      | 9581     | 2956.98  |
| 2                                                                     | 0.9      | 16171.38 | 76151    | 0.9      | 99279.5  | 0.9      | 10940.36 | 0.9      | 0.9      | 0.9      | 15029.65 |
| 3                                                                     | 42091.51 | 72151    | 0.9      | 23867.52 | 47935.4  | 21491.59 | 0.9      | 0.9      | 0.9      | 0.9      | 0.9      |
| 4                                                                     | 63151    | 31149.26 | 8329.17  | 15456.8  | 73564.26 | 18809.41 | 7116.84  | 70345.25 | 28152.38 | 22446.05 | 11625.88 |
| 5                                                                     | 116455   | 136700.7 | 70151    | 0.9      | 0.9      | 0.9      | 0.9      | 52790.16 | 19668.35 | 1156.72  | 0.9      |
| 6                                                                     | 84007.4  | 75051    | 0.9      | 0.9      | 0.9      | 33851.53 | 0.9      | 45868.93 | 0.9      | 20947.63 | 0.9      |
| 7                                                                     | 77451    | 0.9      | 18115.32 | 58930.26 | 25454.72 | 0.9      | 0.9      | 35471.64 | 20837.31 | 0.9      | 0.9      |

## References for Supplemental Information

- [1] Kumar, V. P., Ciscernos, J. A., Frey, K. M., Castellanos-Gonzalez, A., Wang, Y., Gangjee, A., White, A. C., Jorgensen, W. L., and Anderson, K. S. (2014) Structural studies provide clues for analog design of specific inhibitors of *Cryptosporidium hominis* Thymidylate Synthase-Dihydrofolate Reductase, *Bioorg Med Chem Lett* 24, 4158-4161.
- [2] Mukerjee, A., Iyidogan, P., Castellanos-Gonzalez, A., Cisneros, J. A., Czyzyk, D., Ranjan, A. P., Jorgensen, W. L., White, A. C., Jr., Vishwanatha, J. K., and Anderson, K. S. (2015) A nanotherapy strategy significantly enhances anticryptosporidial activity of an inhibitor of bifunctional thymidylate synthase-dihydrofolate reductase from *Cryptosporidium*, *Bioorg Med Chem Lett* 25, 2065-2067.
